# Supplementary material
Source: MDPI journal article supplement (https://www.mdpi.com/2075-4701/8/8/629)
Supplement: s1 [file s1]

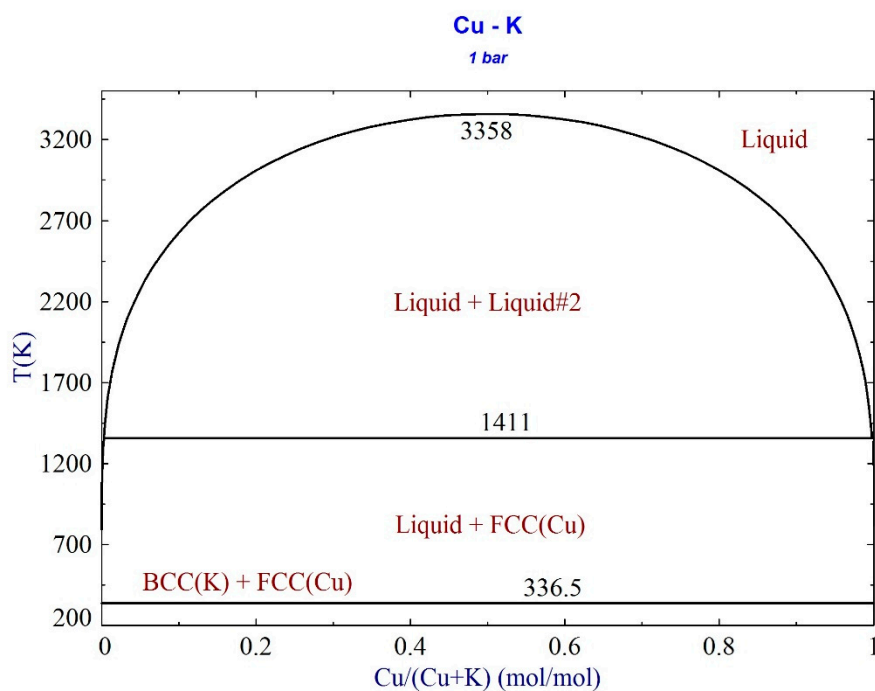

**Figure S1.** General view of the calculated phase diagram of the Cu-K system.

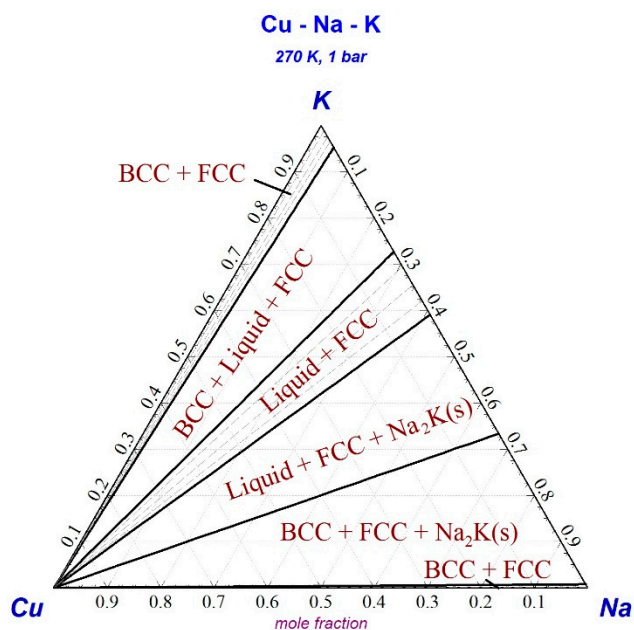

**Figure S2.** Isothermal section at 270 K of the calculated phase diagram of the Cu-Na-K ternary system.

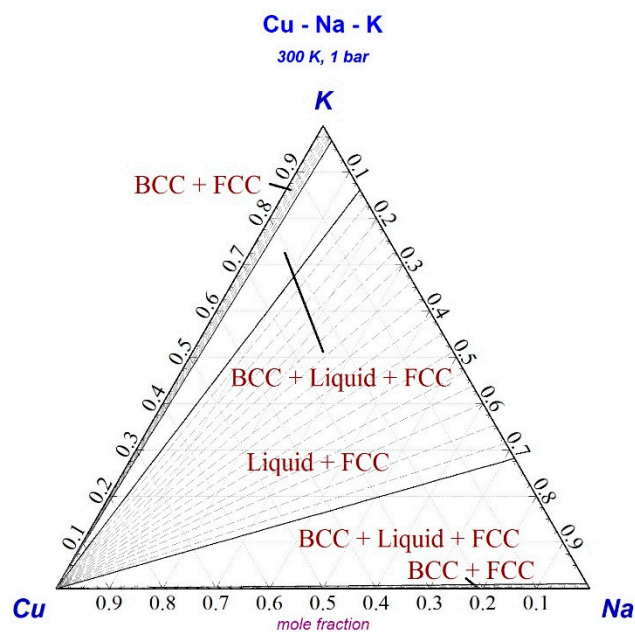

**Figure S3.** Isothermal section at 300 K of the calculated phase diagram of the Cu-Na-K ternary system.

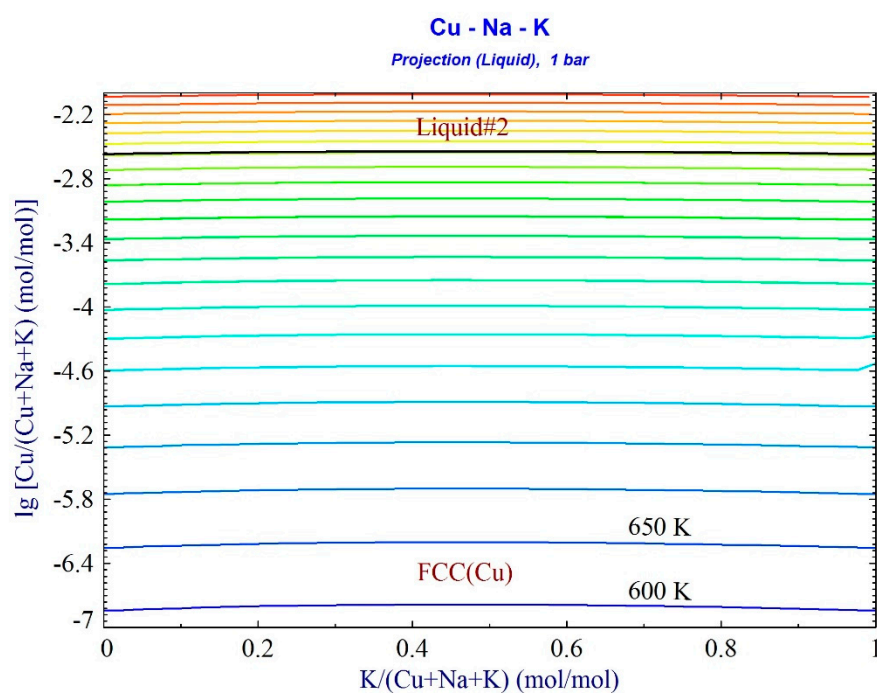

**Figure S4.** Calculated liquidus surface projection of the Cu-Na-K ternary system.
